# Supplementary material
Source: Springer Nature journal article supplement (https://www.springermedizin.de/resource/supplementary/12893_2014_515_MOESM5_ESM.pdf/9512620)

# Re-operation

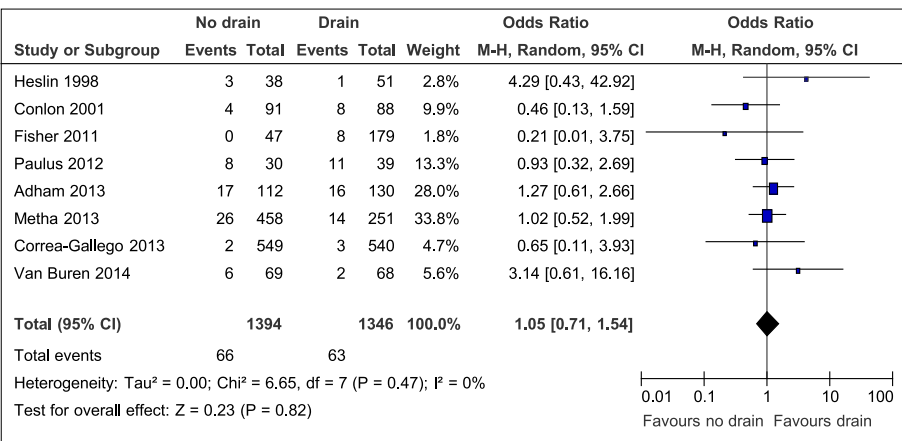

# Length of hospital stay

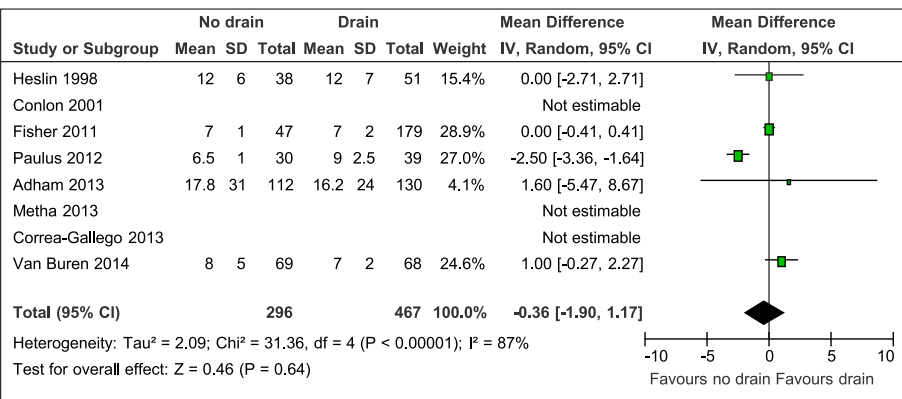

# Mortality

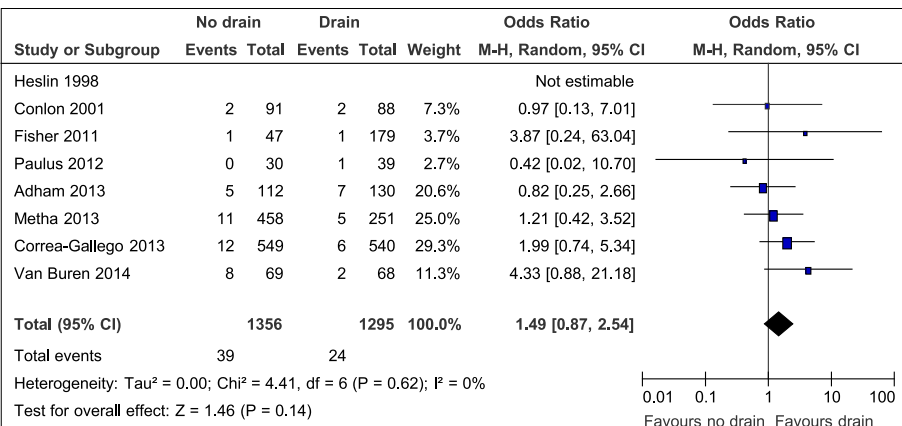

Supplement: MOESM5 [file 9512620]
